# Supplementary material for: Alternative ball-milling synthesis of vanadium-substituted polyoxometalates as catalysts for the aerobic cleavage of C–C and C–O bonds
Source: Royal Society of Chemistry journal article supplement (doi:10.1039/d1dt01585k), 2021-01-01
Supplement: d1dt01585k1.pdf [file d1dt01585k1.pdf]

# Alternative ball-milling synthesis of vanadium-substituted polyoxometalates as catalysts for the aerobic cleavage of C-C and C-O bonds

Louay Al-Hussaini <sup>a,b</sup>, S. Valange <sup>c</sup>, M.E. Gálvez <sup>b,\*</sup> and F. Launay <sup>a,\*</sup>

(a) Sorbonne Université, CNRS, UMR 7197, Laboratoire de Réactivité de Surface (LRS), F-75005 Paris, France

[franck.launay@sorbonne-universite.fr](mailto:franck.launay@sorbonne-universite.fr)

(b) Sorbonne Université, CNRS, UMR 7190, Institut Jean le Rond d'Alembert, F-75005 Paris, France

[elena.galvez\\_parruca@sorbonne-universite.fr](mailto:elena.galvez_parruca@sorbonne-universite.fr)

(c) Institut de Chimie des Milieux et Matériaux de Poitiers (IC2MP), Université de Poitiers, CNRS, ENSI Poitiers, B1, 1 rue Marcel Doré, F-86073 Poitiers Cedex 9, France

-----

## CONTENT

|                                                                                                                                                                                                                                                      |    |
|------------------------------------------------------------------------------------------------------------------------------------------------------------------------------------------------------------------------------------------------------|----|
| <b>1. Further information on the protocols and results of the elemental analysis</b>                                                                                                                                                                 | S2 |
| Table S1. Weight engaged and elemental analyses (from ICP) of the different $V_x$ prepared                                                                                                                                                           | S2 |
| <b>2. XRD profiles and Rietveld refinement (Case of <math>V_3</math> materials)</b>                                                                                                                                                                  | S2 |
| Figure S1. XRD profiles of $V_3$ -HT vs. JCPDS 00-043-0317 ( $H_3PMo_{12}O_{40} \cdot 13H_2O$ )                                                                                                                                                      | S2 |
| Table S2. Refinement results of $V_3$ -HT and $V_3$ -BM <sub>50</sub> -1 <sub>BM</sub> -1.5 <sub>HT</sub> vs. reference $H_3PMo_{12}O_{40} \cdot 13H_2O$                                                                                             | S2 |
| <b>3. TGA analysis (Principle for the determination of n / Case of <math>V_x</math>-BM<sub>50</sub>-1<sub>BM</sub>-1.5<sub>HT</sub> materials)</b>                                                                                                   | S3 |
| Figure S2. TGA-DSC profiles of $V_x$ -BM <sub>50</sub> -1 <sub>BM</sub> -1.5 <sub>HT</sub> catalysts vs $V_3$ -HT                                                                                                                                    | S3 |
| Table S3. Values of $T_1$ and $T_2$ for $V_x$ -HT and $V_x$ -BM <sub>50</sub> -1 <sub>BM</sub> -1.5 <sub>HT</sub> materials measured by TGA                                                                                                          | S4 |
| <b>4. Liquid <sup>31</sup>P NMR (Principle of quantification)</b>                                                                                                                                                                                    | S4 |
| Table S4. Isomers proportions in $PMoV_2$ catalysts                                                                                                                                                                                                  | S4 |
| Figure S3. NMR profile of $V_2$ -BM <sub>50</sub> -1 <sub>BM</sub> -1.5 <sub>HT</sub> , peaks of $V_2$ isomers                                                                                                                                       | S5 |
| <b>5. Liquid <sup>31</sup>P NMR (Case of <math>V_2</math> materials)</b>                                                                                                                                                                             | S5 |
| Figure S4. <sup>31</sup> P NMR spectra of $V_2$ -BM <sub>20</sub> -1-1.5 <sub>HT</sub> vs. $V_2$ -BM <sub>50</sub> -1 <sub>BM</sub> -1.5 <sub>HT</sub> material in $D_2O$ - $H_2O$ 50-50                                                             | S5 |
| <b>6. XRD profiles (Case of <math>V_2</math>-BM<sub>20</sub>-t<sub>BM</sub>-t<sub>HT</sub> materials)</b>                                                                                                                                            | S6 |
| Figure S5. Influence of the milling (t <sub>BM</sub> ) and attack duration (t <sub>HT</sub> ) on XRD profiles of $V_2$ -BM <sub>20</sub> -t <sub>BM</sub> -t <sub>HT</sub> materials vs. $V_2$ -BM <sub>50</sub> -1 <sub>BM</sub> -1.5 <sub>HT</sub> | S6 |
| <b>7. Liquid <sup>31</sup>P NMR (Case of <math>V_2</math>-BM<sub>20</sub>-t<sub>BM</sub>-t<sub>HT</sub>)</b>                                                                                                                                         | S6 |
| Figure S6. <sup>31</sup> P NMR spectra of $V_2$ -BM <sub>20</sub> -t <sub>BM</sub> -t <sub>HT</sub> and $V_2$ -BM <sub>50</sub> -1 <sub>BM</sub> -1.5 <sub>HT</sub> materials in $D_2O$ - $H_2O$ 50-50                                               | S6 |
| <b>8. TGA analysis (Case of <math>V_2</math>-BM<sub>20</sub>-t<sub>BM</sub>-t<sub>HT</sub> materials)</b>                                                                                                                                            | S7 |
| Figure S7. TGA-DSC profiles of $V_2$ -BM <sub>20</sub> -t <sub>BM</sub> -t <sub>HT</sub> catalysts vs. $V_2$ -BM <sub>50</sub> -1-1.5 <sub>HT</sub> ( $V_2$ -BM <sub>50</sub> reference)                                                             | S7 |
| <b>9. Energy consumption: detailed calculation (HT vs BM)</b>                                                                                                                                                                                        | S7 |
| Table S5. Calculation of the energy consumption of $V_3$ -HT and $V_x$ -BM <sub>50</sub> -1 <sub>BM</sub> -1.5 <sub>HT</sub> synthesis procedures                                                                                                    | S8 |
| Table S6. Calculation of the energy consumption of $V_2$ -BM <sub>20</sub> -t <sub>BM</sub> -t <sub>HT</sub> synthesis procedures                                                                                                                    | S8 |
| <b>10. XRD of ball-milled oxides</b>                                                                                                                                                                                                                 | S9 |
| Figure S8. XRD profiles of the mixed oxides ( $x_{th} = 2$ ). (The (110) signal was used for Debye-Scherrer                                                                                                                                          | S9 |

calculations)

**Table S7.** Crystallite size of BM mixed oxides vs. a hand mixture of oxides S9

**11. Synthesis of K** S9

**12. HPLC analysis and calibration curves ( $\lambda = 220$  nm)** S10

**Figure S9.** Chromatogramm of the reaction mixture for **K1<sub>HT</sub>** cleavage in the presence of V<sub>3</sub>-BM<sub>50</sub>-1<sub>BM</sub>-1.5<sub>HT</sub> S10

**Figure S10.** HPLC calibration curves of the products and reactants S11

**13. References** S11

---

**1. Further information on the protocols and results of the elemental analysis**

**Table S1.** Weight engaged and elemental analyses (from ICP) of the different V<sub>x</sub> prepared

| V <sub>x</sub>   |                                                                       | MoO <sub>3</sub> (g) | V <sub>2</sub> O <sub>5</sub> (g) | H <sub>3</sub> PO <sub>4</sub> (g)        | V (%wt.) | Mo (%wt.) | P (%wt.) |
|------------------|-----------------------------------------------------------------------|----------------------|-----------------------------------|-------------------------------------------|----------|-----------|----------|
| HT               | V <sub>3</sub> -HT                                                    | 3.93                 | 0.92                              | 0.39 (85 wt.%)                            | 7.06     | 46.2      | 2.01     |
| BM <sub>50</sub> | V <sub>3</sub> -BM <sub>50</sub> -1 <sub>BM</sub> -1.5 <sub>HT</sub>  | 1.12                 | 0.24                              | 0.24 (28.5 wt.%)                          | 8.02     | 49.9      | 1.80     |
|                  | V <sub>2</sub> -BM <sub>50</sub> -1 <sub>BM</sub> -1.5 <sub>HT</sub>  | 1.21                 | 0.15                              | 0.26 (28.5 wt.%)                          | 5.23     | 53.2      | 1.74     |
| BM <sub>20</sub> | V <sub>2</sub> -BM <sub>20</sub> '-1 <sub>BM</sub> -1.5 <sub>HT</sub> |                      |                                   |                                           | 6.23     | 54.5      | 1.69     |
|                  | V <sub>2</sub> -BM <sub>20</sub> -1 <sub>BM</sub> -3 <sub>HT</sub>    |                      |                                   | 0.07 (85 wt.%) <sup>a</sup>               | 7.13     | 56.4      | 1.21     |
|                  | V <sub>2</sub> -BM <sub>20</sub> -2 <sub>BM</sub> -1.5 <sub>HT</sub>  | 3.02                 | 0.38                              | + 0.04 g H <sub>2</sub> O                 | 5.82     | 53.7      | 1.67     |
|                  | V <sub>2</sub> -BM <sub>20</sub> -2 <sub>BM</sub> -3 <sub>HT</sub>    |                      |                                   |                                           | 7.03     | 56.3      | 1.51     |
|                  | V <sub>2</sub> -BM <sub>20</sub> -4 <sub>BM</sub> -1.5 <sub>HT</sub>  |                      |                                   |                                           | 6.96     | 55.8      | 1.33     |
|                  | V <sub>2</sub> -BM <sub>20</sub> -4 <sub>BM</sub> -3 <sub>HT</sub>    |                      |                                   |                                           | 7.01     | 56.0      | 1.38     |
|                  | V <sub>2</sub> -wBM <sub>50</sub> -1-1.5 <sup>b</sup>                 | 1.21                 | 0.19                              | 0.06 (85 wt.%)<br>+ 50 g H <sub>2</sub> O | n. d.    | n. d.     | n. d.    |

<sup>a</sup> 1.70 g of mixed oxide was used. <sup>b</sup> One-pot synthesis with the introduction of MoO<sub>3</sub>, V<sub>2</sub>O<sub>5</sub> and H<sub>3</sub>PO<sub>4</sub> together.

**2. XRD profiles and Rietveld refinement (Case of V<sub>3</sub> materials)**

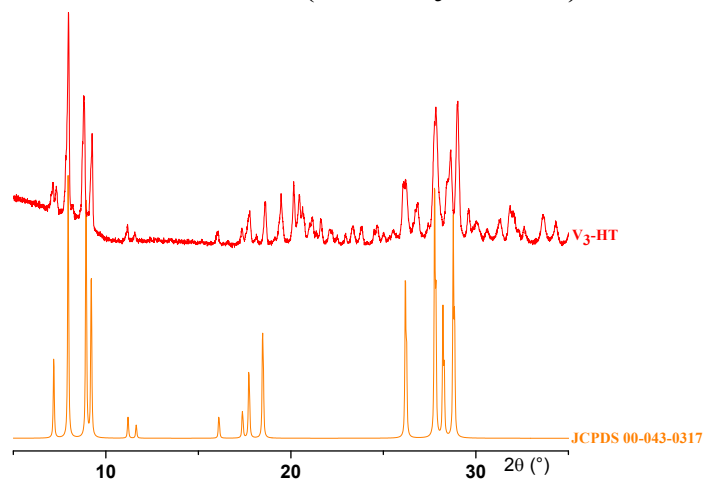

**Figure S1.** XRD profiles of V<sub>3</sub>-HT vs. JCPDS 00-043-0317 (H<sub>3</sub>PMo<sub>12</sub>O<sub>40</sub>. 13H<sub>2</sub>O)  
(Conditions detailed in the experimental section of the manuscript)

**Table S2.** Refinement results of V<sub>3</sub>-HT and V<sub>3</sub>-BM<sub>50</sub>-1<sub>BM</sub>-1.5<sub>HT</sub> vs. reference H<sub>3</sub>PMo<sub>12</sub>O<sub>40</sub>. 13H<sub>2</sub>O

| Sample                                                                             | Cell parameters |        |        |        |        |       | R <sub>p</sub> | Chi <sub>2</sub> |
|------------------------------------------------------------------------------------|-----------------|--------|--------|--------|--------|-------|----------------|------------------|
|                                                                                    | a               | b      | c      | α      | β      | γ     |                |                  |
| V <sub>3</sub> -BM <sub>50</sub> -1 <sub>BM</sub> -1.5 <sub>HT</sub>               | 14.028          | 14.189 | 13.586 | 112.58 | 109.71 | 60.53 | 10             | 2.4              |
| V <sub>3</sub> -HT                                                                 | 14.219          | 14.410 | 13.616 | 112.54 | 110.13 | 60.13 | 15             | 13               |
| Reference<br>H <sub>3</sub> PMo <sub>12</sub> O <sub>40</sub> . 13H <sub>2</sub> O | 14.100          | 14.130 | 13.550 | 112.10 | 109.80 | 60.70 | -              | -                |

-----

### 3. TGA analysis (Principle for the determination of n / Case of V<sub>x</sub>-BM materials)

The TGA profiles of V<sub>x</sub> (H<sub>3+x</sub>PMo<sub>12-x</sub>V<sub>x</sub>O<sub>40</sub>, nH<sub>2</sub>O) catalysts all exhibited two characteristic weight losses corresponding to n equivalents of hydration water (completed at T = T<sub>1</sub>)<sup>R1</sup> and to the loss of 0.5\*(3+x) equivalents of constitutional water (for T<sub>1</sub> < T < T<sub>2</sub>)<sup>R2</sup>.

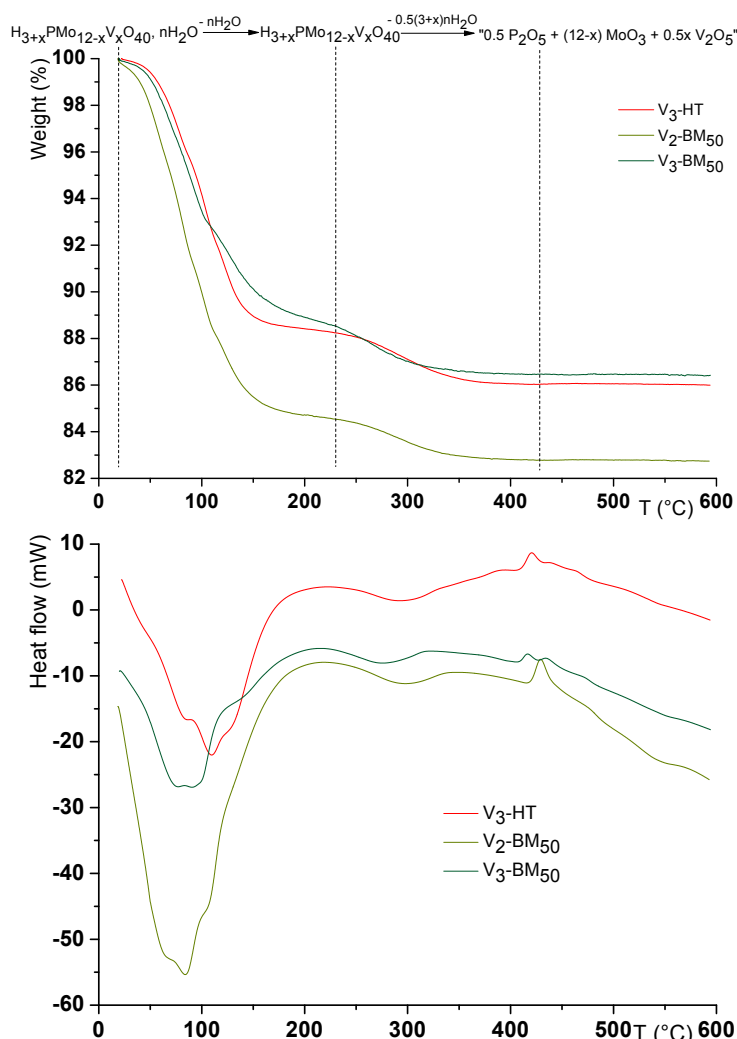

**Figure S2.** TGA-DSC profiles of V<sub>x</sub>-BM<sub>50</sub>-1<sub>BM</sub>-1.5<sub>HT</sub> (V<sub>x</sub>-BM<sub>50</sub>) catalysts vs V<sub>3</sub>-HT  
(Conditions detailed in the experimental section of the manuscript)

Even if  $x_{exp}$  can be calculated by TGA-DSC, ICP was preferred because, especially for V<sub>3</sub>, the evaporation of hydration and of constitutive water are overlapped<sup>R3</sup>. The equation used for  $x_{exp}$  calculation is:

$$x_{exp} = \frac{12}{1 + \frac{M_V w_{Mo}}{M_{Mo} w_V}}$$

where  $w_{Mo}$  and  $w_V$  are the weight proportions of Mo and V.

The hydration index n can be obtained from the first weight loss,  $\Delta m_1\%$ , since it is related to n

as follows:

$$\Delta m_1\% = 100M_{H_2O} \frac{n}{M_{V_x}} = 100M_{H_2O} \frac{n}{M_{V_{x,d}} + nM_{H_2O}}$$

where  $V_{x,d}$  corresponds to the dehydrated form of  $V_x$ .  $M_{V_{x,d}}$ , the molecular weight of  $V_{x,d}$  can be obtained by :

$$M_{V_{x,d}} = M_{PMo_{12}} - 43.992x$$

where  $PMo_{12}$  is the phosphomolybdic acid ( $H_3PMo_{12}O_{40}$ ).

**Table S3.** Values of  $T_1$  and  $T_2$  for  $V_x$ -HT and  $V_x$ -BM<sub>50</sub>-1<sub>BM</sub>-1.5<sub>HT</sub> materials measured by TGA

| $x_{th}$ | $r$ | $t_{BM}$ (h) | $t_{HT}$ (h) | Name                                                         | $T_1$ (°C) | $T_2$ (°C) |
|----------|-----|--------------|--------------|--------------------------------------------------------------|------------|------------|
| 3        | -   | 0            | 6.5          | $V_3$ -HT                                                    | 222.1      | 420.6      |
| 2        | 50  | 1            | 1.5          | $V_2$ -BM <sub>50</sub> -1 <sub>BM</sub> -1.5 <sub>HT</sub>  | 218.7      | 429.1      |
| 3        |     | 1            | 1.5          | $V_3$ -BM <sub>50</sub> -1 <sub>BM</sub> -1.5 <sub>HT</sub>  | 215.8      | 416.4      |
| 2        | 20  | 1            | 1.5          | $V_2$ -BM <sub>20</sub> '-1 <sub>BM</sub> -1.5 <sub>HT</sub> | 222.6      | 428.4      |
|          |     |              | 3            | $V_2$ -BM <sub>20</sub> -1 <sub>BM</sub> -3 <sub>HT</sub>    | 214.7      | 428.4      |
|          |     | 2            | 1.5          | $V_2$ -BM <sub>20</sub> -2 <sub>BM</sub> -1.5 <sub>HT</sub>  | 232.9      | 430.9      |
|          |     |              | 3            | $V_2$ -BM <sub>20</sub> -2 <sub>BM</sub> -3 <sub>HT</sub>    | 214.0      | 428.3      |
|          |     | 4            | 1.5          | $V_2$ -BM <sub>20</sub> -4 <sub>BM</sub> -1.5 <sub>HT</sub>  | 213.7      | 428.0      |
|          |     |              | 3            | $V_2$ -BM <sub>20</sub> -4 <sub>BM</sub> -3 <sub>HT</sub>    | 211.2      | 427.4      |

#### 4. Liquid <sup>31</sup>P NMR (Principle of quantification)

In the conditions used, the <sup>31</sup>P NMR integration of the signals is quantitative (see details and hypotheses the manuscript). The yield of  $V_x$  ( $\eta_{V_x}$ ) was calculated as shown below:

$$\eta_{V_x} = 100 \frac{I_{V_x}}{I_{V_x} + I_{H_3PO_4}}$$

where  $I_{V_x}$  and  $I_{H_3PO_4}$  are the integrations of  $V_x$  and of unreacted  $H_3PO_4$  signals.

**Table S4.** Isomers proportions in PMoV<sub>2</sub> catalysts

| Isomer <sup>a</sup>               |  |  |  |  |      |
|-----------------------------------|-------------------------------------------------------------------------------------|-------------------------------------------------------------------------------------|---------------------------------------------------------------------------------------|---------------------------------------------------------------------------------------|------|
| Chemical shift (ppm) <sup>b</sup> | -4.21                                                                               | -4.03                                                                               | -3.94                                                                                 | -3.77                                                                                 |      |
| Localization of V atoms           | Vicinal on the same triad                                                           | Vicinal on different triads                                                         | Not vicinal                                                                           | n. d.                                                                                 |      |
| <b>Proportions (%)</b>            | $V_2$ -BM <sub>50</sub> -1 <sub>BM</sub> -1.5 <sub>HT</sub>                         | 58.5                                                                                | 12.6                                                                                  | 16.3                                                                                  | 12.7 |
|                                   | $V_2$ -BM <sub>20</sub> '-1 <sub>BM</sub> -1.5 <sub>HT</sub>                        | 47.9                                                                                | 17.1                                                                                  | 24.0                                                                                  | 11.0 |
|                                   | $V_2$ -BM <sub>20</sub> -1 <sub>BM</sub> -3 <sub>HT</sub>                           | 42.2                                                                                | 18.7                                                                                  | 27.0                                                                                  | 12.1 |
|                                   | $V_2$ -BM <sub>20</sub> -2 <sub>BM</sub> -1.5 <sub>HT</sub>                         | 49.1                                                                                | 14.3                                                                                  | 23.3                                                                                  | 13.3 |
|                                   | $V_2$ -BM <sub>20</sub> -2 <sub>BM</sub> -3 <sub>HT</sub>                           | 46.0                                                                                | 19.1                                                                                  | 20.6                                                                                  | 14.2 |
|                                   | $V_2$ -BM <sub>20</sub> -4 <sub>BM</sub> -1.5 <sub>HT</sub>                         | 45.2                                                                                | 14.7                                                                                  | 25.5                                                                                  | 14.6 |

| $V_2\text{-BM}_{20}\text{-4BM-3}_{HT}$                                                                                                                                               | 37.4 | 23.8 | 21.1 | 17.7 |
|--------------------------------------------------------------------------------------------------------------------------------------------------------------------------------------|------|------|------|------|
| PMoV <sub>2</sub> 30 mg in H <sub>2</sub> O-D <sub>2</sub> O 1:1 500 $\mu$ L + 7.5 $\mu$ L dioxane, 400 MHz, 16 scans, relaxation delay: 32 s; n. d. = not defined                   |      |      |      |      |
| <sup>a</sup> $\alpha$ and $\beta$ -isomer structures were taken from Refs R4 and R5 ( $\beta$ -4,10 and $\beta$ -4,11 are two examples of $\beta$ isomer), <sup>b</sup> See Fig. S3. |      |      |      |      |

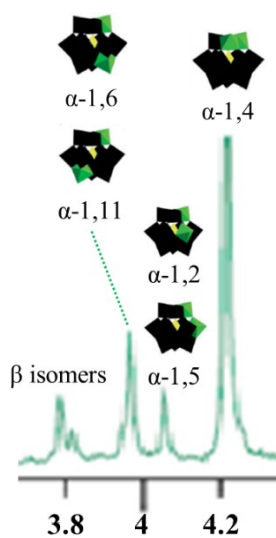

**Figure S3.** NMR profile of  $V_2\text{-BM}_{50}\text{-1BM-1.5}_{HT}$ , peaks of  $V_2$  isomers

### 5. Liquid <sup>31</sup>P NMR (Case of $V_2$ materials)

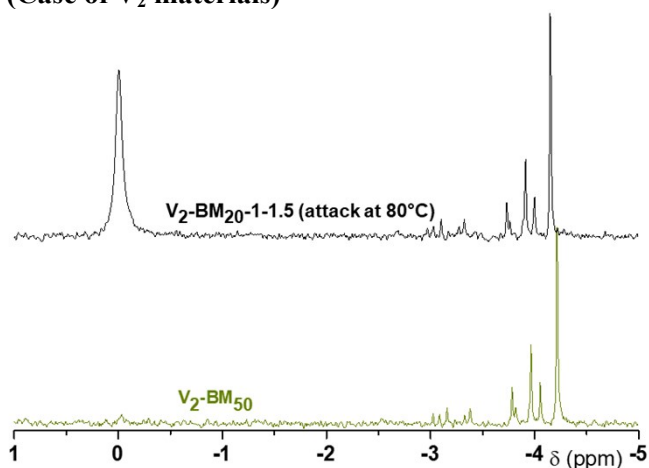

**Figure S4.** <sup>31</sup>P NMR spectra of  $V_2\text{-BM}_{20}\text{-1-1.5}_{HT}$  vs.  $V_2\text{-BM}_{50}\text{-1-1.5}_{HT}$  ( $V_2\text{-BM}_{50}$ ) material in D<sub>2</sub>O-H<sub>2</sub>O 50-50

## 6. XRD profiles (Case of $V_2-BM_{20}-t_{BM}-t_{HT}$ materials)

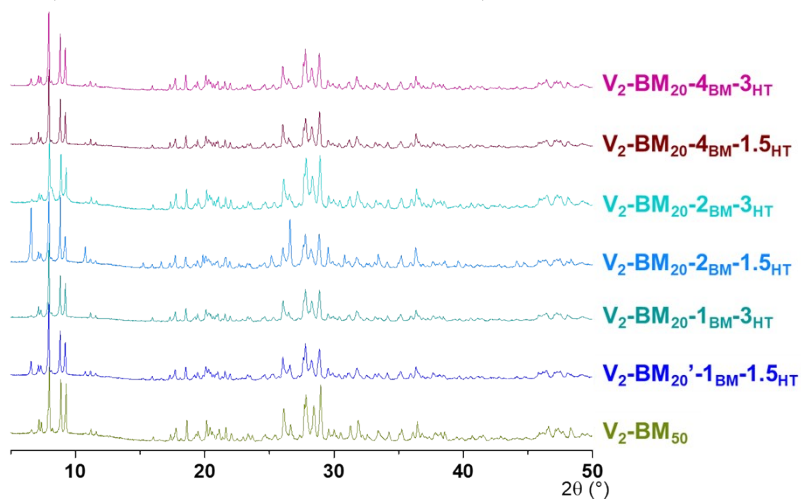

**Figure S5.** Influence of the milling ( $t_{BM}$ ) and attack duration ( $t_{HT}$ ) on XRD profiles of  $V_2-BM_{20}-t_{BM}-t_{HT}$  materials vs.  $V_2-BM_{50}-1-1.5_{HT}$  ( $V_2-BM_{50}$ )

-----

## 7. Liquid $^{31}P$ NMR (Case of $V_2-BM_{20}-t_{BM}-t_{HT}$ )

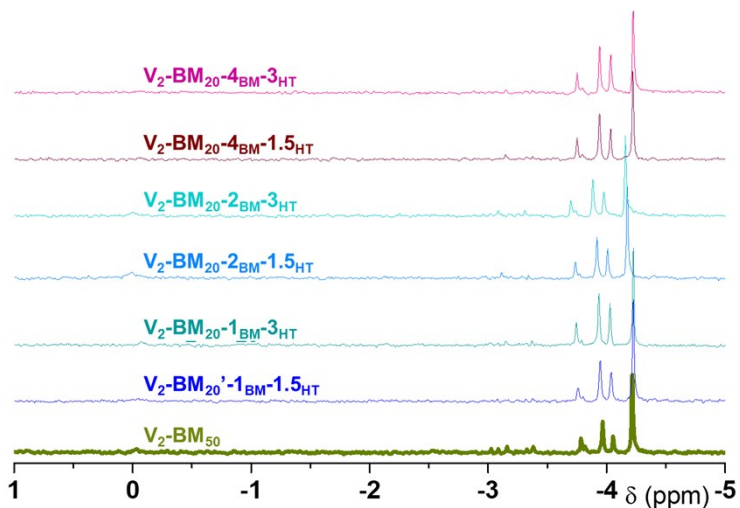

**Figure S6.**  $^{31}P$  NMR spectra of  $V_2-BM_{20}-t_{BM}-t_{HT}$  materials vs.  $V_2-BM_{50}-1-1.5_{HT}$  ( $V_2-BM_{50}$ ) in  $D_2O-H_2O$  50-50

## 8. TGA analysis (Case of $V_2BM_{20-t_{BM}-t_{HT}}$ materials)

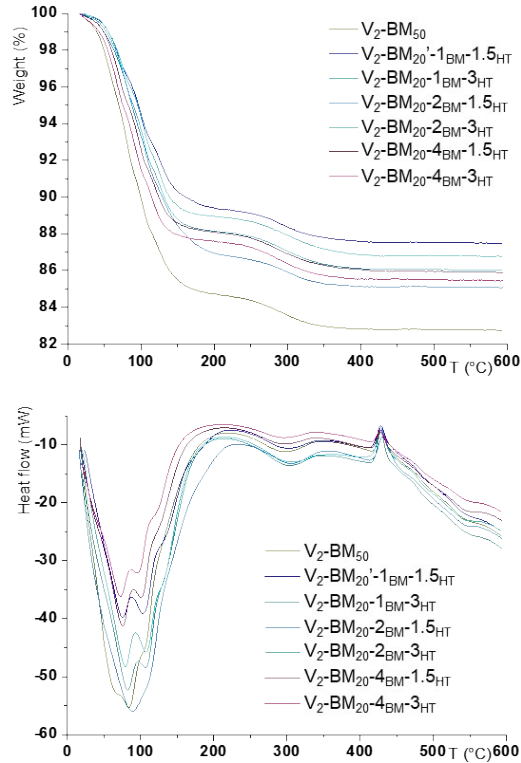

Figure S7. TGA-DSC profiles of  $V_2-BM_{20-t_{BM}-t_{HT}}$  materials vs.  $V_2-BM_{50-1-1.5_{HT}}$  ( $V_2-BM_{50}$  reference)

## 9. Energy consumption: detailed calculation (HT vs BM)

The electric power required for the electronic device is much lower than the required power for the milling and the attack steps. So, it can be neglected. Therefore, the equation of the global energy consumption is:

$$E_{tot} = E_{BM} + E_{HT} + E_c = P_{BM}t_{BM} + P_{HT}t_{HT} + P_c t_c$$

where  $E_{BM}$ ,  $E_{HT}$  and  $E_c$  are respectively the contribution of the milling, of the attack steps and of the cooling systems to the total energy consumption.

The power required for the reflux condenser (noted  $P_c$ ) during the attack was estimated using the Bernoulli equation:

$$\rho g z = \frac{P_c}{Q}$$

where  $\rho = 10^3 \text{ kg m}^{-3}$ ,  $g = 9.81 \text{ m s}^{-2}$ ,  $z = 20 \text{ cm}$  (height of the condenser),  $Q \approx 150 \text{ L/h}$

In these conditions:  $P_c = 8.4 \cdot 10^{-2} \text{ W}$ .

The maximal power of the heater used is  $P_{th,max} = 825 \text{ W}$  and the maximal temperature noted  $T_{max}$  is  $300^\circ\text{C}$ . Supposing the starting temperature is  $20^\circ\text{C}$ , as the energy is proportional to the

rise of the temperature, the average power noted  $P_{HT}$  required for the thermal heating until a

$$P_{HT} = \left( \frac{T - 20}{T_{max} - 20} \right) P_{max}$$

temperature  $T$  is given by the equation:

$$\text{For } T = 100^\circ\text{C}, P_{HT} = 236 \text{ W} \Rightarrow P_c \ll P_{HT} \text{ and therefore, for } V_{HT} \text{ solids, } E_t \approx P_{BM}t_{HT}$$

In the case of  $V_{BM}$  materials, the ball-milling step (with a range of rotation speed,  $100 < \omega < 1100$  rpm) has also to be considered. The maximal power (for  $\omega_{max} = 1100$  rpm) is  $P_{BM,max} = 1100$  W. As the combined weight of the sample and of the ball represent less than 10% of the autoclave, it can be asserted that it almost does not have any influence on the energy consumption. Therefore, the power needed for the milling procedure is proportional to the square of the rotation speed of the autoclave<sup>R6</sup> and can be calculated by the formula:

$$P_{BM} = \left( \frac{\omega}{\omega_{max}} \right)^2 P_{BM,max}$$

Also, the power required for the cooling system ( $P_c'$ ) can be estimated to 5-20 W<sup>R6</sup>. So, likewise the hydrothermal procedure,  $P_c + P_c' \ll P_{BM} + P_{HT}$  and  $E_t \approx P_{BM}t_{HT} + P_{BM}t_{HT}$

The values for the energy consumption required by the preparation of all the materials prepared are given in Tables S6 ( $V_3$ -HT and  $V_x$ -BM<sub>50</sub>) and S7 ( $V_2$ -BM<sub>20</sub>).

**Table S5.** Calculation of the energy consumption of  $V_3$ -HT and  $V_x$ -BM<sub>50</sub>-1<sub>BM</sub>-1.5<sub>HT</sub> synthesis procedures

| Procedure (temperature)                                  | Hydrothermal (100°C) | Ball milling, r = 50 (80°C) |             |
|----------------------------------------------------------|----------------------|-----------------------------|-------------|
| $x_{th}$                                                 | 3                    | 2                           | 3           |
| Milling duration (h)                                     | 0                    |                             | 1           |
| Energy consumption during the milling step (kW.h)        | 0                    |                             | 0.45        |
| Attack duration (h)                                      | 6.5                  |                             | 1.5         |
| Energy consumption by heating (kW.h)                     | 1.53                 |                             | 0.27        |
| <b>Global energy consumption (kW.h)</b>                  | <b>1.53</b>          |                             | <b>0.72</b> |
| Weight (g)                                               | 5.345                | 2.897                       | 2.937       |
| Yield (%)                                                | 79                   | 97                          | 95          |
| <b>Global energy consumption (kW.h mol<sup>-1</sup>)</b> | <b>627</b>           | <b>437</b>                  | <b>431</b>  |

**Table S6.** Calculation of the energy consumption of  $V_2$ -BM<sub>20</sub>-t<sub>BM</sub>-t<sub>HT</sub> synthesis procedures

| Procedure                                                | Ball-milling, r = 20 |             |             |             |             |             |
|----------------------------------------------------------|----------------------|-------------|-------------|-------------|-------------|-------------|
| Milling duration (h)                                     | 1                    | 1           | 2           | 2           | 4           | 4           |
| Energy consumption during the milling step (kW.h)        | 0.45                 | 0.45        | 0.89        | 0.89        | 1.78        | 1.78        |
| Attack duration (h)                                      | 1.5                  | 3           | 1.5         | 3           | 1.5         | 3           |
| Temperature (°C)                                         | 100                  | 80          | 80          | 80          | 80          | 80          |
| Energy consumption by heating (kW.h)                     | 0.35                 | 0.53        | 0.27        | 0.53        | 0.27        | 0.53        |
| <b>Global energy consumption (kW.h)</b>                  | <b>0.80</b>          | <b>0.98</b> | <b>1.16</b> | <b>1.52</b> | <b>2.05</b> | <b>2.31</b> |
| <b>Global energy consumption (kW.h mol<sup>-1</sup>)</b> | <b>198</b>           | <b>240</b>  | <b>287</b>  | <b>357</b>  | <b>508</b>  | <b>563</b>  |

Maximum anhydrous P<sub>Mo</sub>V<sub>x</sub> 6.950 g, yield 92-97%



## 10. XRD of ball-milled oxides

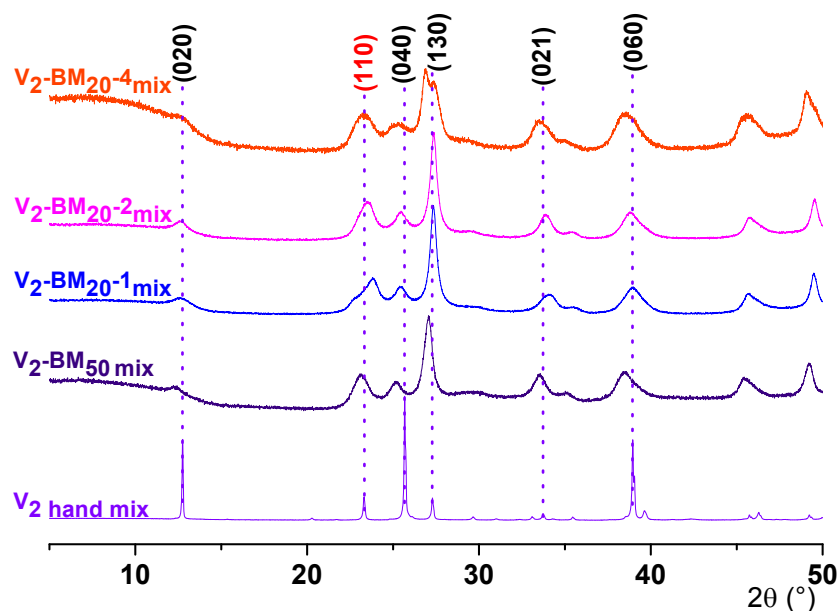

**Figure S8.** XRD profiles of the mixed oxides ( $x_{th} = 2$ ). (The (110) signal was used for Debye-Scherrer calculations)

Herein, the aim is to compare the crystallite size of the mixtures before and after milling and we do not seek to calculate them accurately. So, the Scherrer equation will be used:

$$\tau = \frac{K\lambda_{Cu}}{L_{FWHM} \cos^2(\theta)}$$

where  $K = 0.888$  is the shape factor,  $\lambda_{Cu} = 1.5408 \text{ \AA}$  is the X-Ray wavelength,  $L_{FWHM}$  is the full width at half maximum of the considered peak (here (110)) and  $2\theta$  is the position of the peak.

**Table S7.** Crystallite size of BM mixed oxides vs. a hand mixture of oxides

| Entry | Oxide                         | r  | $t_{BM}$ (h) | $L_{FWHM}$ (°) | Position of the peak (110) (°) | Crystallite size (Å) |
|-------|-------------------------------|----|--------------|----------------|--------------------------------|----------------------|
| 1     | $V_2$ hand mix                | -  | -            | 0.1434         | 23.31                          | 15.6                 |
| 2     | $V_2$ -BM <sub>50</sub>       | 50 | 1            | 0.9486         | 23.08                          | 2.8                  |
| 3     | $V_2$ -BM <sub>20-1</sub> mix | 20 | 1            | 1.4469         | 23.49                          | 1.4                  |
| 4     | $V_2$ -BM <sub>20-2</sub> mix | 20 | 2            | 1.3897         | 23.80                          | 1.3                  |
| 5     | $V_2$ -BM <sub>20-4</sub> mix | 20 | 4            | 1.1693         | 23.49                          | 1.7                  |

## 11. Synthesis of K

The procedure was inspired by NICHOLS *et al*<sup>R7</sup>. Hence, 2-bromoacetophenone (16.85 g, 84 mmol) and an excess of phenol (9.56 g, 101 mmol) were dissolved in 200 mL of acetone, then 20 g of K<sub>2</sub>CO<sub>3</sub> were added to the solution. The mixture may take a pink coloration due to the formation of phenolate that disappears with time. Reflux is needed during 6 h to get **K**. Initially pale yellow, the coloration became yellow and then orange. The reaction was monitored by TLC using cyclohexane/diethylether 80/20 as the eluent. After filtration and acetone evaporation, **K** was recrystallized in a minimum amount of absolute ethanol. **K** was then recovered by filtration and dried by pressing. The formation of the ether bond was checked by FT-IR by the presence of a band at 1240 cm<sup>-1</sup>. **K** was characterized more deeply by <sup>1</sup>H NMR according to Ref R7.

<sup>1</sup>H NMR (CD<sub>3</sub>CN, 300 MHz): 8.05 (m, 2H), 7.66 (m, 1H), 7.54 (m, 2H), 7.33 (m, 2H), 7.00 (m, 3H), 5.31 (s, 2H).

This above-mentioned procedure was repeated several times at different scales affording yields of **K** of *c.a.* 80%.

## 12. HPLC analysis and calibration curves ( $\lambda = 220$ nm)

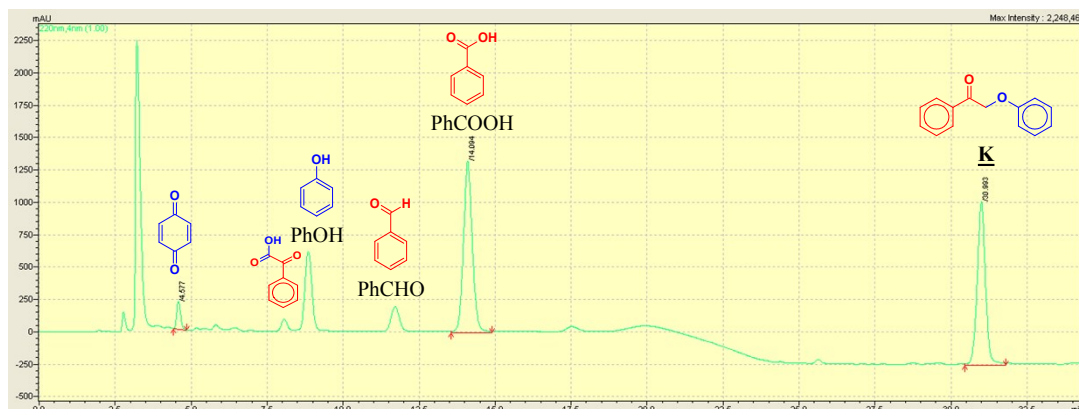

**Figure S9.** Chromatogram of the reaction mixture for **K** cleavage in the presence of *V*<sub>3</sub>-*BM*<sub>50</sub>-*I*<sub>BM</sub>-*I*<sub>5HT</sub> (Conditions detailed in the experimental section of the manuscript and in Table 4, entry 2)

The substrate and the targeted cleavage products were calibrated at 210 and 220 nm.

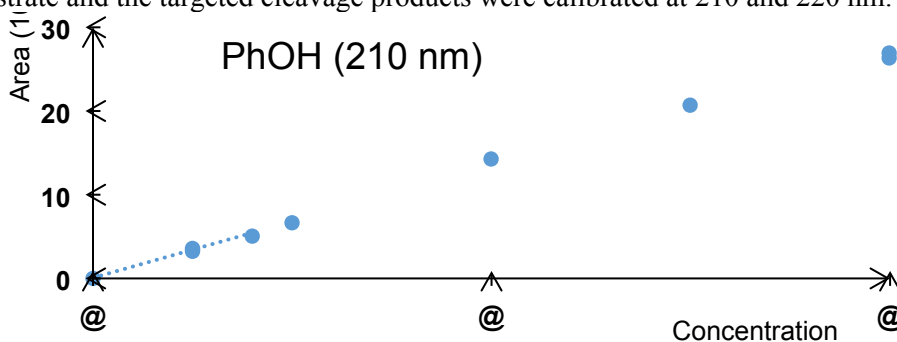

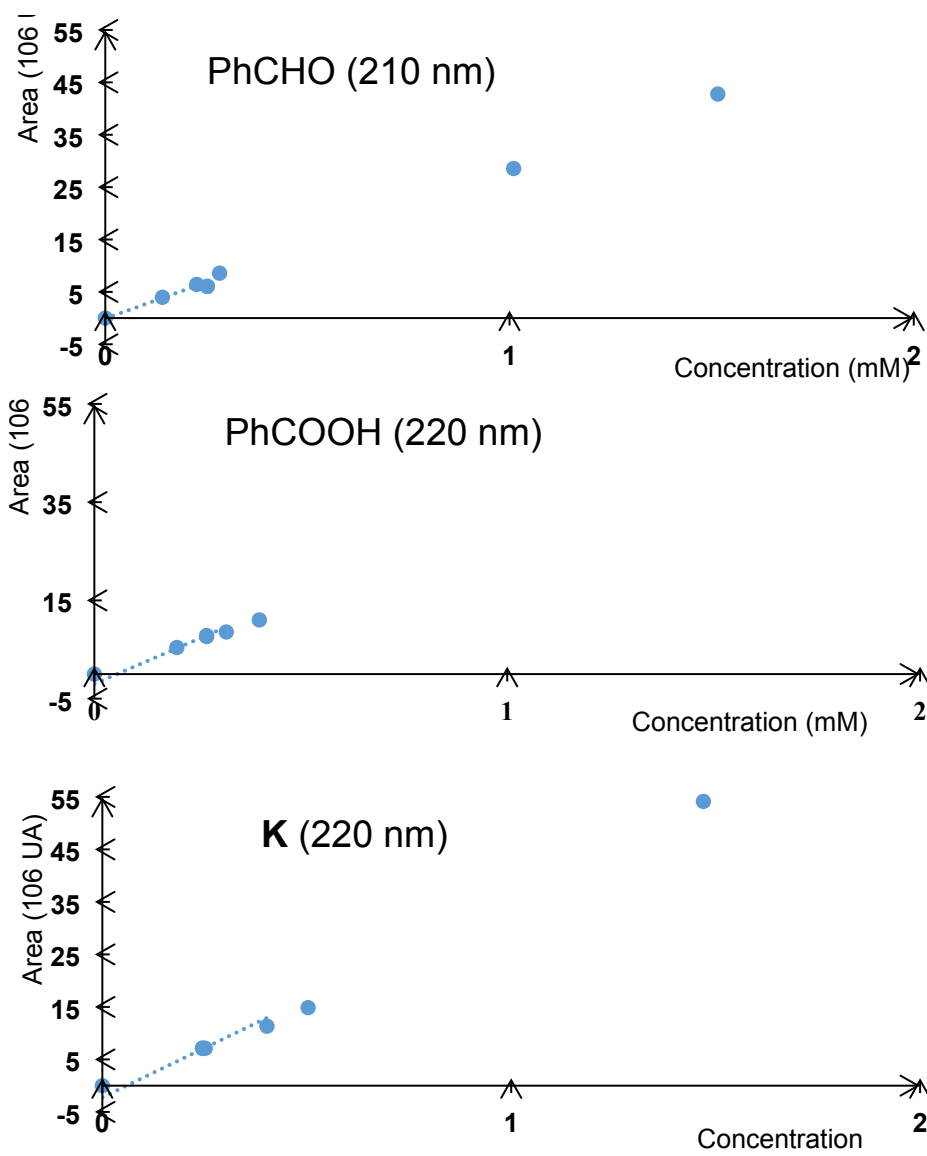

**Figure S10.** HPLC calibration curves of the products and reactants  
(Conditions detailed in the experimental section of the manuscript)

### 13. References

- [R1] D. Barats-Damatov, L. J. W. Shimon, Y. Feldman, T. Bendikov, R. Neumann, Solid-State Crystal-to-Crystal Phase Transitions and Reversible Structure-Temperature Behavior of Phosphovanadomolybdic Acid,  $H_5PV_2Mo_{10}O_{40}$ , *Inorg. Chem.* **2015**, 54, 628-634.
- [R2] T. Okuhara, N. Mizuno, M. Misono, Catalytic Chemistry of Heteropoly Compounds, *Adv. Catal.* **1996**, 41, 113-252.
- [R3] P. Villabrille, G. Romanelli, L. Gassa, P. Vázquez, C. Cáceres, Synthesis and characterization of Fe- and Cu-doped molybdovanadophosphoric acids and their application in catalytic oxidation, *Appl. Catal. A: Gen.* **2007**, 324, 69-76.
- [R4] R. Neumann, A. M. Khenkin, Molecular oxygen and oxidation catalysis by

phosphovanadomolybdates, *Chem. Commun.* **2006**, 2529-2538.

[R5] L. Pettersson, Equilibria of Polyoxometalates in Aqueous Solution, *Mol. Eng.* **1993**, 3, 29-42.

[R6] L. Hao, Y. Lu, H. Sato, H. Asanuma, J. Luo, Analysis on energy transfer during mechanical coating and ball milling-Supported by electric power measurement in planetary ball mill, *Intern. J. Mineral Process.* **2013**, 121, 51-58.

[R7] J. M. Nichols, L. M. Bishop, R. G. Bergman, J. A. Ellman, Catalytic C-O Bond Cleavage of 2-Aryloxy-1-arylethanol and Its Application to the Depolymerization of Lignin-Related Polymers, *J. Am. Chem. Soc.* **2010**, 132, 12554-12555.
